# Supplementary material for: The Arabidopsis stomatal polarity protein BASL mediates distinct processes before and after cell division to coordinate cell size and fate asymmetries
Source: Oxford University Press journal article supplement (doi:10.1242/dev.199919), 2021-08-31
Supplement: dev199919supp.pdf [file dev199919supp.pdf]

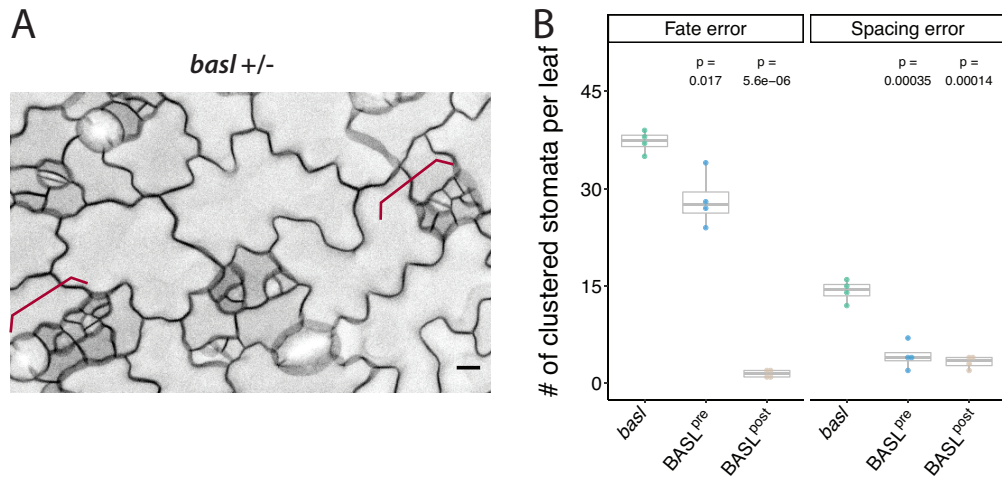

**Fig. S1. The epidermal phenotype of *basl +/-* plants and quantification of absolute numbers of stomatal clusters in BASL variant lines.**

(A) Confocal image of 5 dpf *BASL +/-* abaxial cotyledon epidermis. Cell outlines are visualized by pATML1::RC12A-mCherry. Braces indicate clustered small cells. This and similar images are the source data quantified in Figure 1 K-L. Scale bar, 10  $\mu$ m. (B) Counts of stomatal clusters from which Figure 3D was calculated. P-values are calculated by Student's *t*-test due to small sample sizes. Pairwise p-values comparing individual genotypes to *basl* are presented.

**Table S1. Primers used in this study**

| Primer name                                                | Sequence (5'-3')                       |
|------------------------------------------------------------|----------------------------------------|
| <i>Cloning of BASL CDS into pENTR R2-BASL Stop-L3</i>      |                                        |
| attB2r-BASL F                                              | GTACAAAGTGGCTATGGCTTCACAGTGG           |
| attB3-BASL Stop R                                          | ATAATAAAGTTGTCAGAATCTACAAC             |
| attB2r_adapter                                             | GGGGACAACCTTGTATAATAAAGTTG             |
| attB3_adapter                                              | CTCTATCACTCACTAAAGAG                   |
| <i>Cloning of Venus-DBox into pENTR L1-Venus-DBox-L2</i>   |                                        |
| DBox part1 BamHI cacc F                                    | CTCAACAATCCACGGATGATGTTGTTGTGG         |
| DBox part2 F                                               | CAGGTTTTTTGAGATTATCCTCC                |
| DBox part2 R                                               | AAAAAACCTGTAGTCAAGAGAAACGC             |
| DBox part3 F                                               | CTTCTCTCGAGCAGCAACTAAACC               |
| DBox part3 R                                               | GCUGGUGGATCCATGGTGAGCAAGGGCG           |
| BamHI-Venus F                                              | ACCAGCGGATCCCTTGTACAGCTCGTCCATGCC      |
| BamHI-Venus w/o Stop R                                     | GTACAAAGTGGCTGGTACCATGGTGAGCAAGGG      |
| <i>Cloning of BASL promoter into pENTR L4-pBASL-R1</i>     |                                        |
| pBASL F                                                    | CCGCGGCCGCGGATATTCATCTTTGCTACACAAGAGTC |
| pBASL R                                                    | CGCGGCCGCGGCTGTTATGTTTGTGTTTCTTTGTCAC  |
| <i>Cloning of KNOLLE promoter into pENTR L4-pKNOLLE-R1</i> |                                        |
| pKNOLLE F                                                  | TGATGATTACCACAAGCTCC                   |
| pKNOLLE R                                                  | CTTTTTCACCTGAAAGTCAAC                  |
| <i>Direct mutagenesis of DBox into mDBox</i>               |                                        |
| Direct mut DBox F                                          | GAAACGGTCAAGTTGTTGGTGA                 |
| Direct mut DBox R                                          | TCACCAACAACCTTGACCGTTTC                |
